# Supplementary material for: Loss of function of GATA3 induces basal-like mammary tumors
Source: PubMed Central journal article supplement (PMC8692904; doi:10.7150/thno.65796), 2022-01-01
Supplement: thnov12p0720s1.pdf [file thnov12p0720s1.pdf]

Table S1:  
List of primer sequence

| Gene       | Species | FW/RV | Sequence                                                           |
|------------|---------|-------|--------------------------------------------------------------------|
| Gapdh      | Mouse   | FW    | GGTGAAGGTCGGTGTGAACG                                               |
| Gapdh      | Mouse   | RV    | TGTAGACCATGTAGTTGAGG                                               |
| Gata3      | Mouse   | FW    | GCTGACGGAAGAGGTGGACGTACT                                           |
| Gata3      | Mouse   | RV    | TGGTGGGTTCGGAGGATACCT                                              |
| Cdh1       | Mouse   | FW    | AACAACCTGCATGAAGGCGGGAATC                                          |
| Cdh1       | Mouse   | RV    | CCTGTGCAGCTGGCTCAAATCAA                                            |
| Foxa1      | Mouse   | FW    | CAGGGTTGGATGGTTGTGTC                                               |
| Foxa1      | Mouse   | RV    | GTTGCTGACAGGGACAGAGG                                               |
| p18        | Mouse   | FW    | GAGCCTTGGGGGAACGAGTTG                                              |
| p18        | Mouse   | RV    | TCTCCGATTTCCAAGTTTC                                                |
| Egr2       | Mouse   | FW    | GCCAAGGCCGTAGACAAAATC                                              |
| Egr2       | Mouse   | RV    | CCACTCCGTTTCTGCTGCTCA                                              |
| Id4        | Mouse   | FW    | CAGTGCATATGAACGACTGC                                               |
| Id4        | Mouse   | RV    | GACTTTCTTGTGGGGCGGGAT                                              |
| Tbx2       | Mouse   | FW    | CCGATGACTGCCGCTATAAGT                                              |
| Tbx2       | Mouse   | RV    | CCATCCACTGTTCCCCTGT                                                |
| Slug       | Mouse   | FW    | CACATTCGAACCCACACATTGCCT                                           |
| Slug       | Mouse   | RV    | TGTGCCCTCAGTTTTGATCTGTCT                                           |
| Sma        | Mouse   | FW    | GAGAAGCCCAGCCAGTCG                                                 |
| Sma        | Mouse   | RV    | CTCTTGCTCTGGGCTTCA                                                 |
| Esr1       | Mouse   | FW    | GCAAGTGTTACGAAGTGGGCATG                                            |
| Esr1       | Mouse   | RV    | GCAGCCCTCATGTCTCCTGAAG                                             |
| GATA3      | Human   | FW    | CACAACCACACTCTGGAGGAG                                              |
| GATA3      | Human   | RV    | GTCCTCCAGTGAGTCATGCAC                                              |
| CDH1       | Human   | FW    | CCAGGAGCCAGACACATTTATGG                                            |
| CDH1       | Human   | RV    | CTGTGTACGTGCTGTTCTTCACG                                            |
| ESR1       | Human   | FW    | CGGCTCCGTAATGCTACGAAGT                                             |
| ESR1       | Human   | RV    | CTCTCTGGCGCTTGTGTTTCAAC                                            |
| TWIST2     | Human   | FW    | GTCCATGTCCGCCTCCCACT                                               |
| TWIST2     | Human   | RV    | TCTCTCGACGCTGGTGGAGG                                               |
| EGR2       | Human   | FW    | TCAACATTGACATGACTGGAGAG                                            |
| EGR2       | Human   | RV    | AGTGAAGGTCTGGTTTCTAGGT                                             |
| SMA        | Human   | FW    | AAAAGACAGCTACGTGGGTGA                                              |
| SMA        | Human   | RV    | GCCATGTTCTATCGGGTACTTC                                             |
| SLUG       | Human   | FW    | CCCACACATTACCTTGTGTTTGCAA                                          |
| SLUG       | Human   | RV    | CAATGCTCTGTTGCAGTGAGG                                              |
| GAPDH      | Human   | FW    | AGGTGAAGGTCGGAGTCAAC                                               |
| GAPDH      | Human   | RV    | AGTTGAGGTCAATGAAGGGG                                               |
| Sh-Gata3-a | Mouse   |       | gatccgGTACATGGAAGCTCAGTATCCTCAAGA<br>GGGATACTGAGCTTCCATGTACTtttttg |
| Sh-Gata3-b | Mouse   |       | gatccgGCCAGATAGCATGAAGCTGGATCAAGA<br>GTCCAGCTTCATGCTATCTGGCtttttg  |
| Sh-Gata3-c | Mouse   |       | gatccgGGCTGTACTACAAGCTTCATATCAAGA<br>GTATGAAGCTTGTAGTACAGCCtttttg  |
| Sh-control | Mouse   |       | gatccgACAGAAGCGATTGTTGATCtttttg                                    |

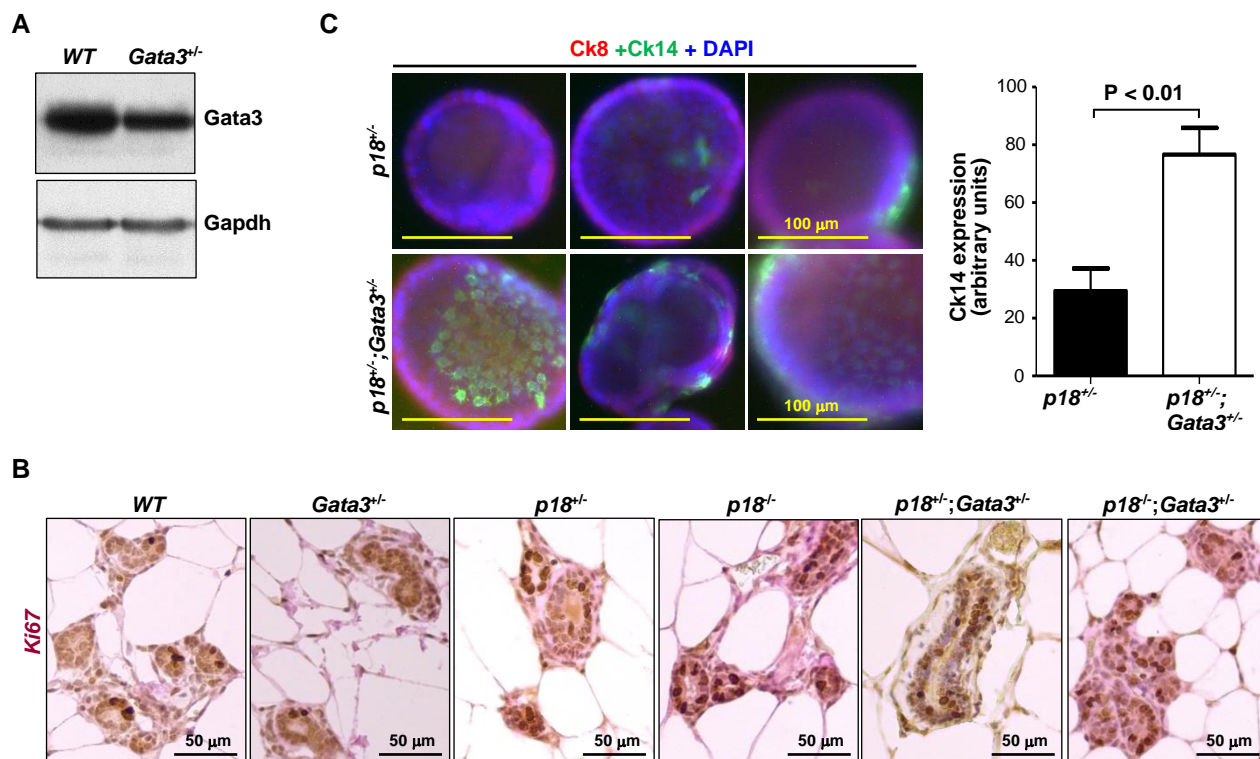

**Figure S1. Analysis of *Gata3* heterozygous mice and cells.** (A) *Gata3* heterozygosity leads to reduction of *Gata3* expression in spleen. Tissues from spleen of WT and *Gata3*<sup>+/-</sup> mice at 2 months of age were analyzed. (B) *Gata3* heterozygosity reduces MEC proliferation, which is rescued by *p18* deficiency. Representative mammary tissue from 8-10-month old mice were analyzed by immunohistochemistry with *Ki67*. (C) *Gata3* heterozygosity promotes basal differentiation in MECs. Freshly isolated mammary cells were cultured in Matrigel-coated plates. Nine days after culture, the colonies were immunostained with *Ck8* and *Ck14*. *Ck14* expression in colonies was quantified by ImageJ software (right panel). The assay was performed in triplicate for each animal. The bar graphs represent the mean ± SD of two animals per group.

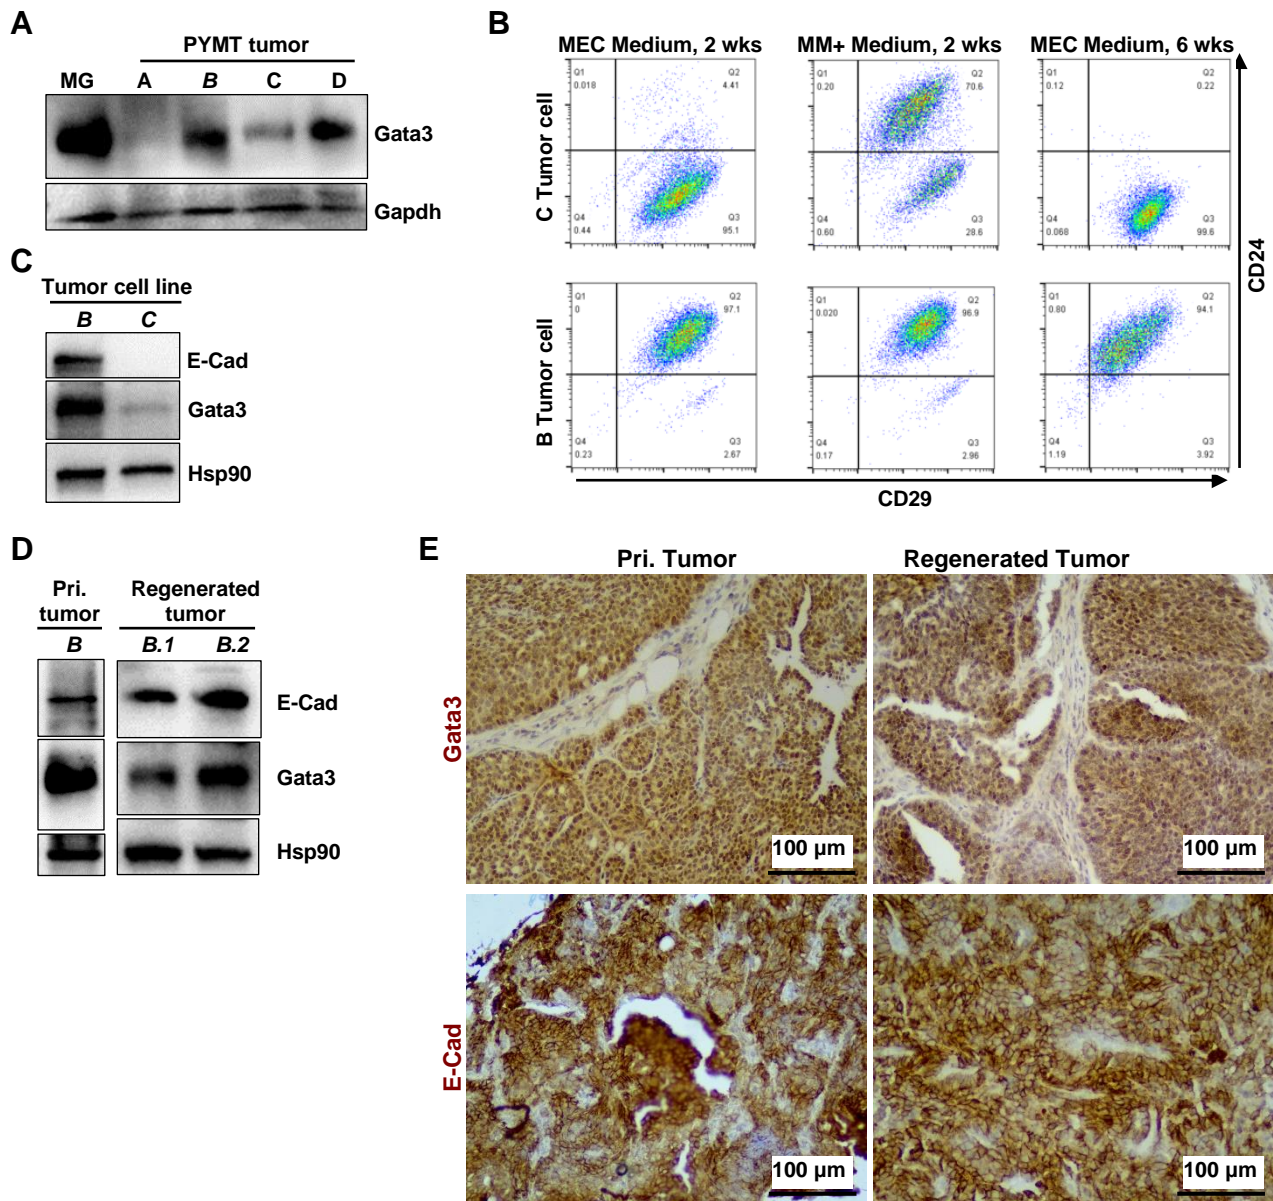

**Figure S2. Establishment of a Gata3 functional murine luminal tumor system. (A)**

Screening of mammary tumors developed in individual MMTV-PyMT mice. MG, mammary gland from WT mouse. Note the distinct level of GATA3 in tumors. (B) FACS analysis of primary tumor cell lines derived from tumor B and C in (A) and cultured in MEC and MM+ media. Note that C tumor cells contained two populations ( $CD24^-CD29^{low}$  and  $CD24^+CD29^{low}$ ) in MM+ medium in two weeks and one  $CD24^-CD29^{low}$  population in MEC medium in two and six weeks whereas B tumor cells contained only one  $CD24^+CD29^{low}$  population in both media and all time points. (C) Western blot analysis of primary tumor cell lines derived from tumor B and C in (A) and cultured in MEC media. (D, E) B tumor cell line was transplanted into mammary fat pads (MFPs) of NCG mice and the regenerated tumors were then analyzed by western blot (D) and IHC (E). Note the comparable expression level and pattern of Gata3 and E-Cad between primary and regenerated tumors, as well as among individual tumors regenerated. Pri., primary.

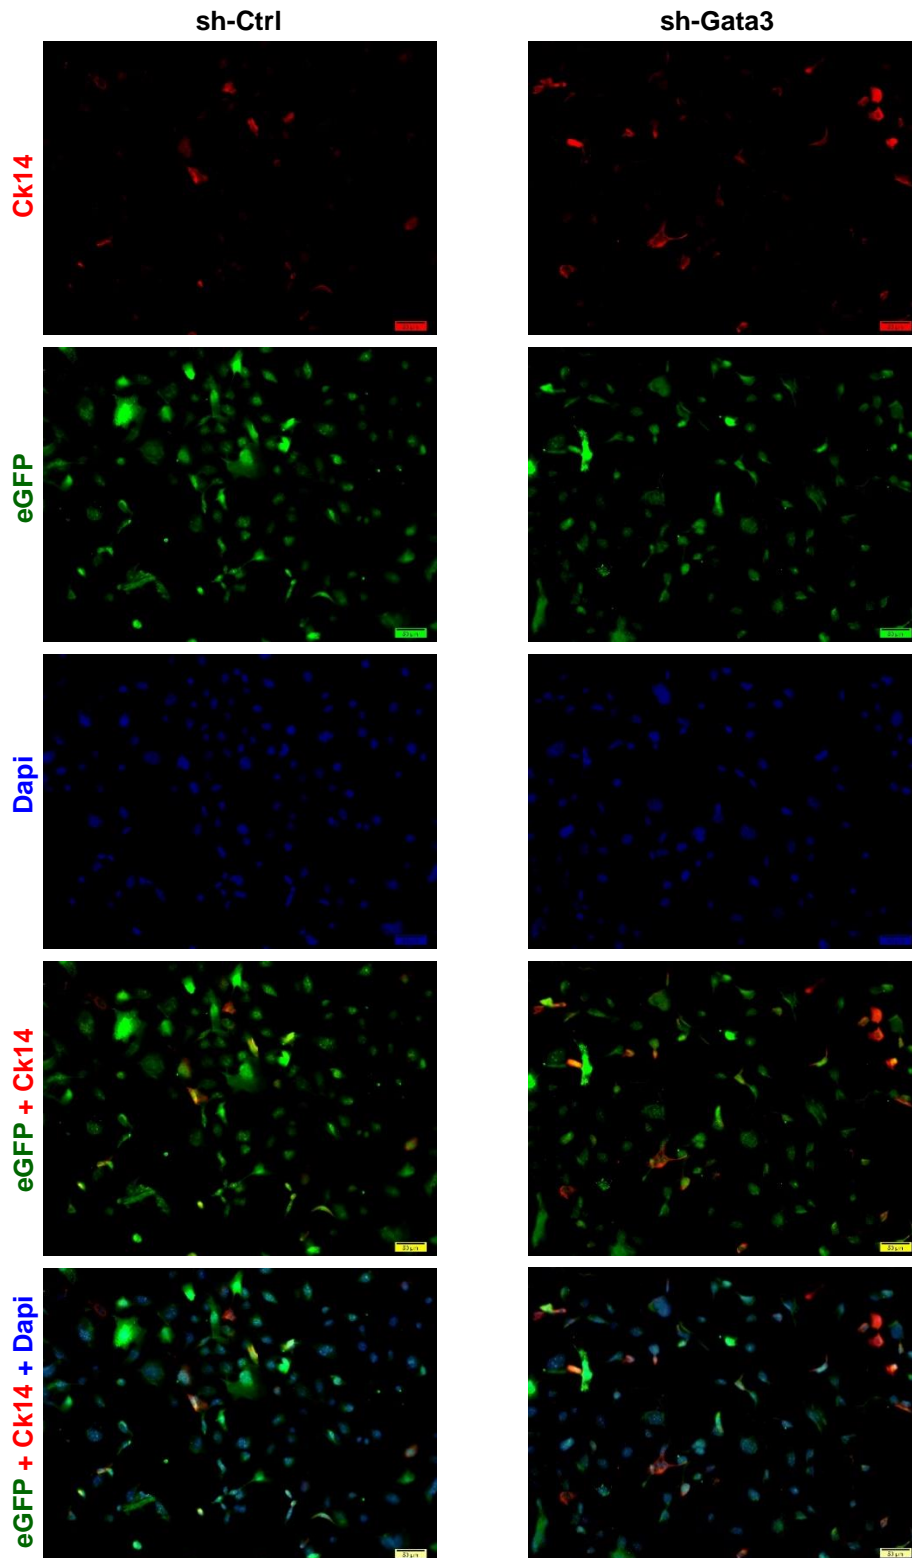

**Figure S3. Depletion of Gata3 in luminal tumor cells stimulate basal-like differentiation.**

Representative immunofluorescent staining analysis of the MMTV-PyMT luminal tumor cells infected with sh-Ctrl and sh-Gata3. Cells were immunostained with antibodies against eGFP (Green) and Ck14 (Red). Note the increased eGFP and Ck14 double positive cells in sh-Gata3 group.

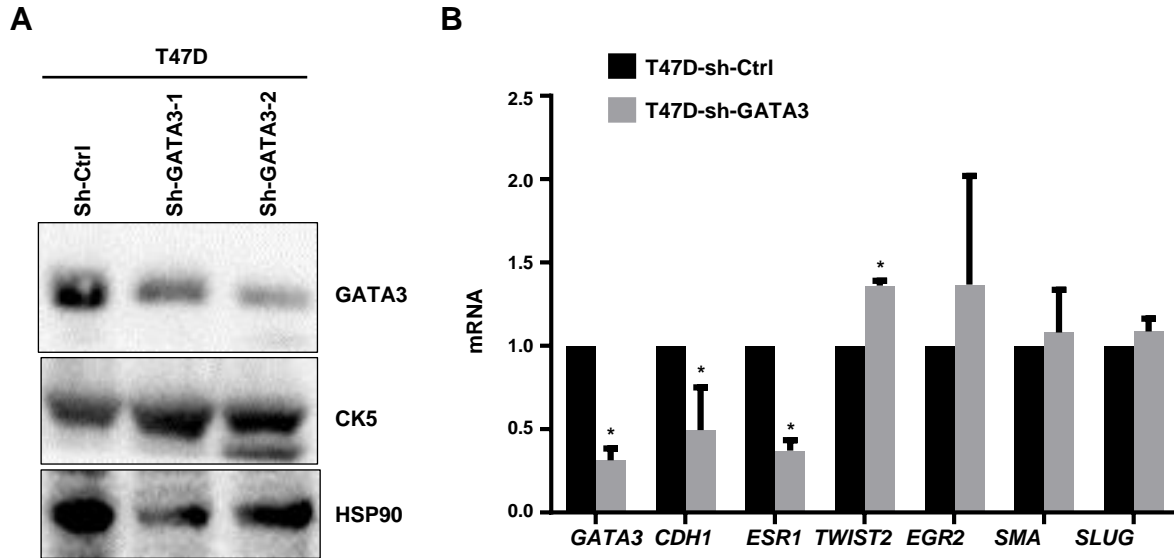

**Figure S4. Knockdown of GATA3 in human luminal breast cancer cells significantly reduces the expression of genes associated with luminal differentiation, and moderately enhances the expression of genes associated with basal differentiation.** (A, B) T47D cells were infected with pGIPZ-sh-Control (sh-Ctrl) or pGIPZ-sh-GATA3 targeting different sequences of human GATA3 (sh-GATA3-1 and sh-GATA3-2), selected with puromycin, and analyzed by western blot (A) and qRT-PCR (B).

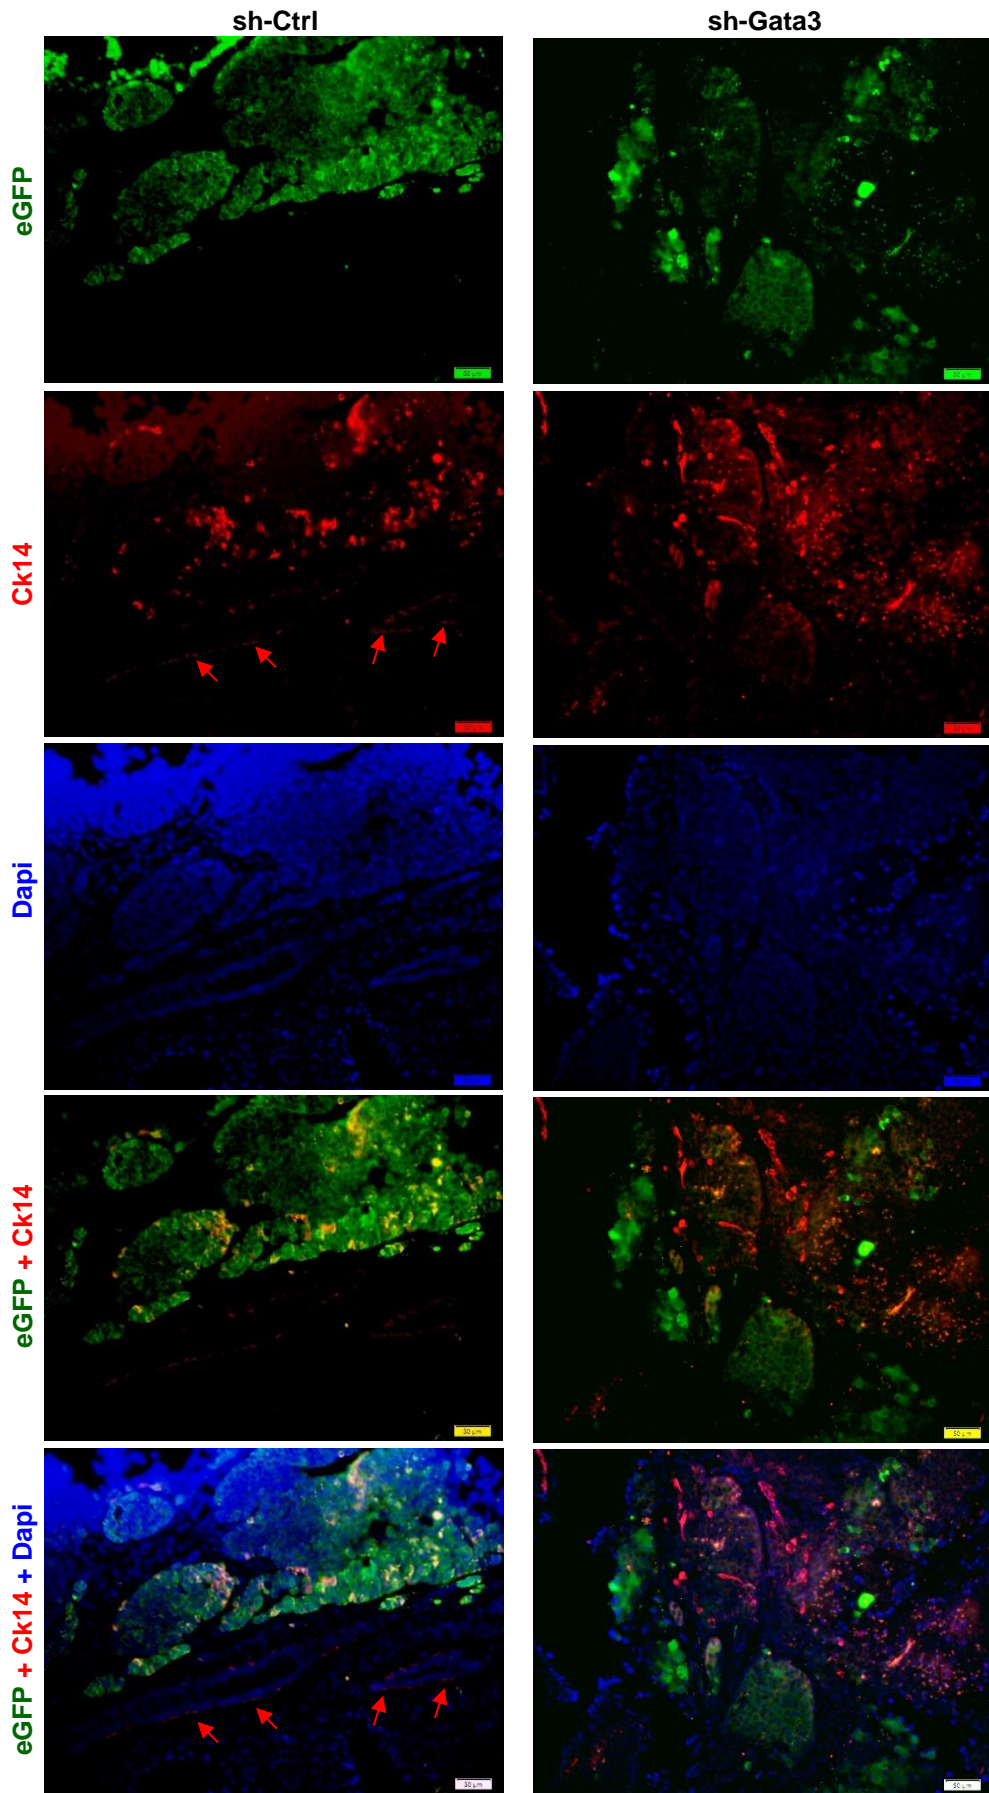

**Figure S5. Depletion of Gata3 in luminal tumor cells induces basal-like tumors in vivo.**

Mammary tumors formed by transplantation of MMTV-PyMT luminal tumor cells stably expressing sh-Ctrl or sh-Gata3 were immunostained with antibodies against eGFP and Ck14. Ck14 positive basal cells in tumor-free mammary glands are indicated (Red arrows).

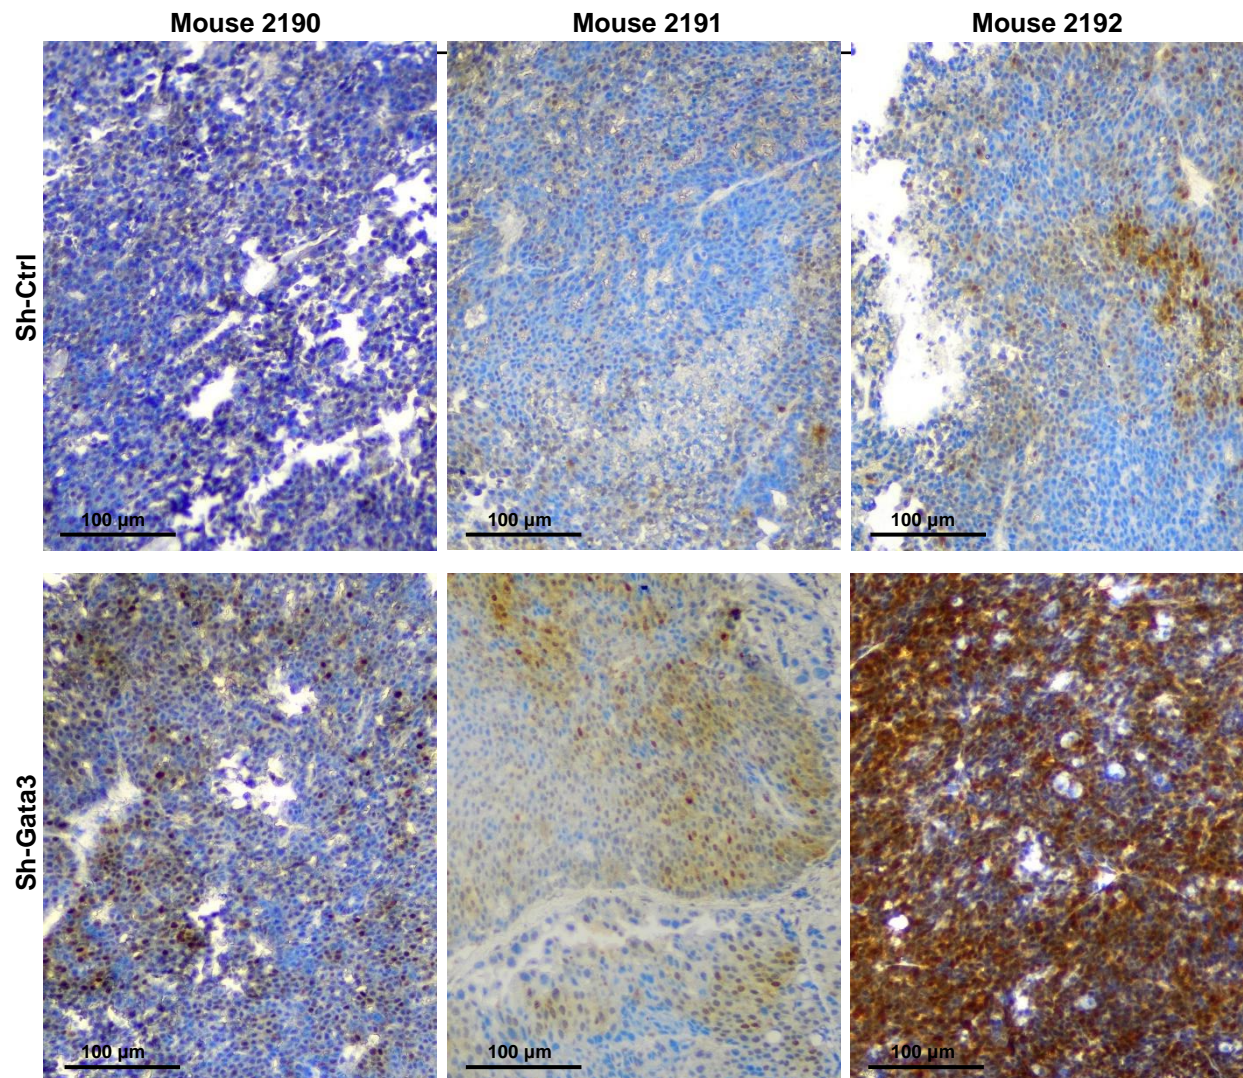

**Fig. S6. Depletion of Gata3 in luminal tumor cells stimulates the expression of p18 in regenerated tumors.** MMTV-PyMT luminal tumor cells stably expressing sh-Ctrl or sh-Gata3 were transplanted into the left and right inguinal MFPs of NCG mice, respectively. Mammary tumors regenerated were immunostained with antibodies against p18. Note the highly expressed p18 in sh-Gata3 tumors relative to that in sh-Ctrl tumors.



**A**

| GEPIA Breast cancer Database | Correlation with GATA3 Coefficient | Correlation with GATA3 p value |
|------------------------------|------------------------------------|--------------------------------|
| <i>ID4</i>                   | -0.35                              | 5.1E-33                        |
| <i>EGR2</i>                  | -0.084                             | 0.0058                         |
| <i>TBX2</i>                  | 0.13                               | 1.2E-05                        |
| <i>TWIST2</i>                | -0.19                              | 1.6E-10                        |
| <i>SLUG</i>                  | -0.19                              | 9.9E-11                        |
| <i>CK14</i>                  | -0.24                              | 2.1E-15                        |
| <i>CK5</i>                   | -0.34                              | 1.8E-31                        |

**B**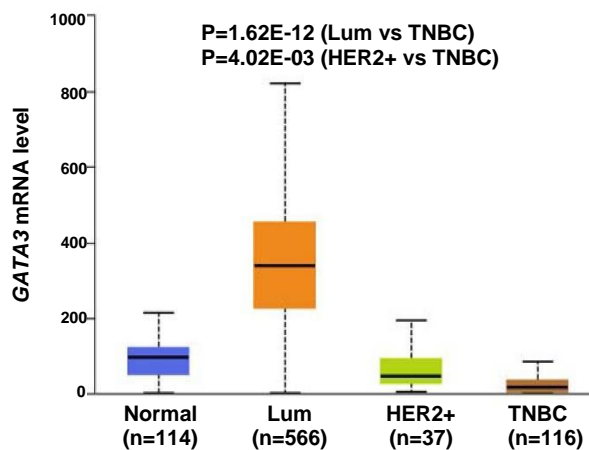

**Figure S7. Analysis of GATA3 with basal markers and major subclasses in human breast cancers.** (A) Correlation analysis of mRNA expression of GATA3 and basal markers in Gene Expression Profiling Interactive Analysis (GEPIA) human breast cancer dataset (<http://gepia.cancer-pku.cn/>). (B) Analysis of *GATA3* mRNA expression in TCGA breast cancer patients according to major subclass in UALCAN dataset (<http://ualcan.path.uab.edu/index.html>).
